# Supplementary material for: A halogenophilic pathway in the reactions of transition metal carbonyl anions with [(η6-iodobenzene)Cr(CO)3]
Source: Royal Society of Chemistry journal article supplement (doi:10.1039/c4dt01363h), 2014-01-01
Supplement: c4dt01363h1.pdf [file c4dt01363h1.pdf]

## Halogenophilic pathway in the reactions of transition metal carbonyl anions with $[(\eta^6\text{-iodobenzene})\text{Cr}(\text{CO})_3]$

Petr K. Sazonov<sup>a\*</sup>, Vasiliy A. Ivushkin<sup>a</sup>, Victor N. Khrustalev<sup>b</sup>, Natal'ya G. Kolotyrkina<sup>c</sup>, and Irina P. Beletskaya<sup>a\*</sup>

<sup>a</sup> *Chemistry Department of the M.V. Lomonosov Moscow State University, 119992 Moscow. Fax: +7 495 939 3618; e-mail: beletska@org.chem.msu.ru*

<sup>b</sup> *A.N. Nesmeyanov Institute of Organoelement Compounds (INEOS), Russian Academy of Sciences, Vavilov Street 28, 119991, Moscow, Russia*

<sup>c</sup> *ND Zelinsky Institute of Organic Chemistry, Department of Structural Studies (IOC), Russian Academy of Sciences, Moscow 119991, Russia*

### Electronic supplementary information

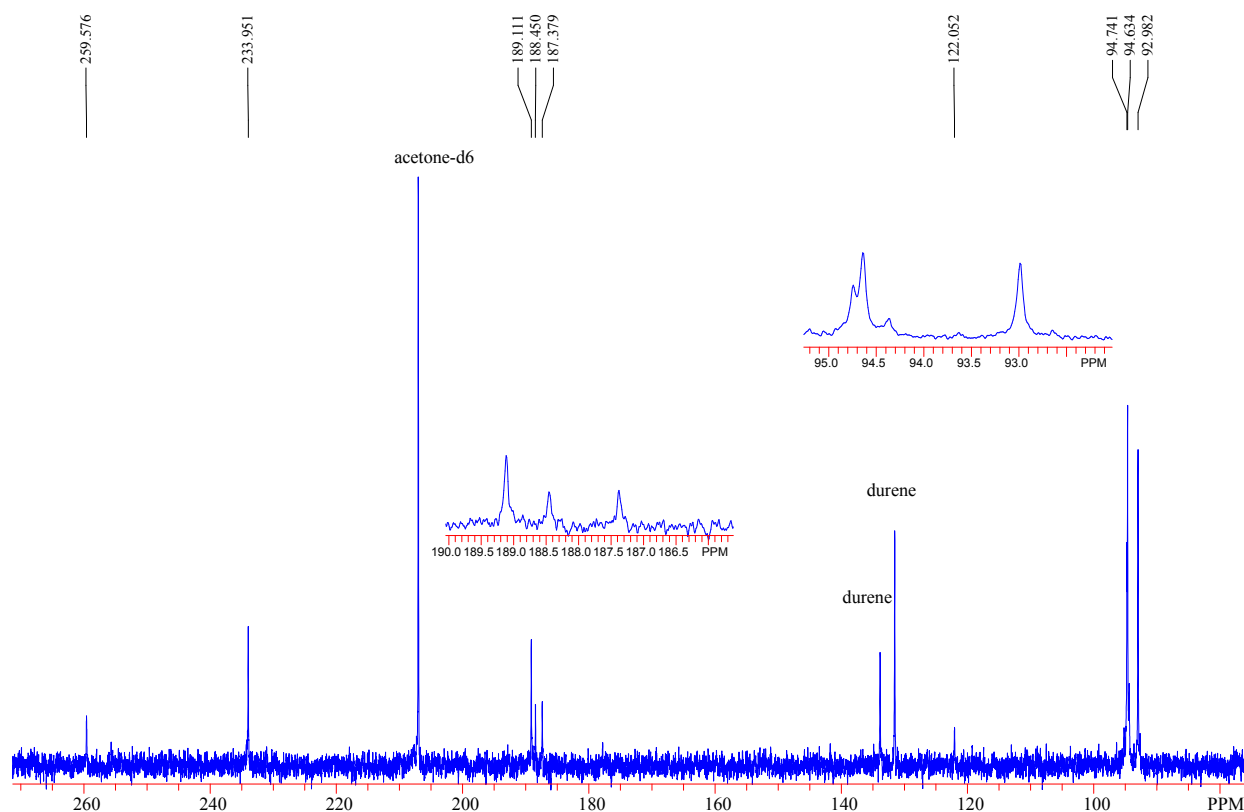

Figure S1. The  $^{13}\text{C}$  NMR spectrum of  $\text{Na}[(\eta^6\text{-C}_6\text{H}_5\text{COPRe(CO)}_4\text{I)Cr(CO)}_3]$  formed in the reaction of  $[(\eta^6\text{-C}_6\text{H}_5\text{I)Cr(CO)}_3]$  with  $\text{Na[Re(CO)}_5]$  (THF, 100.6 MHz).

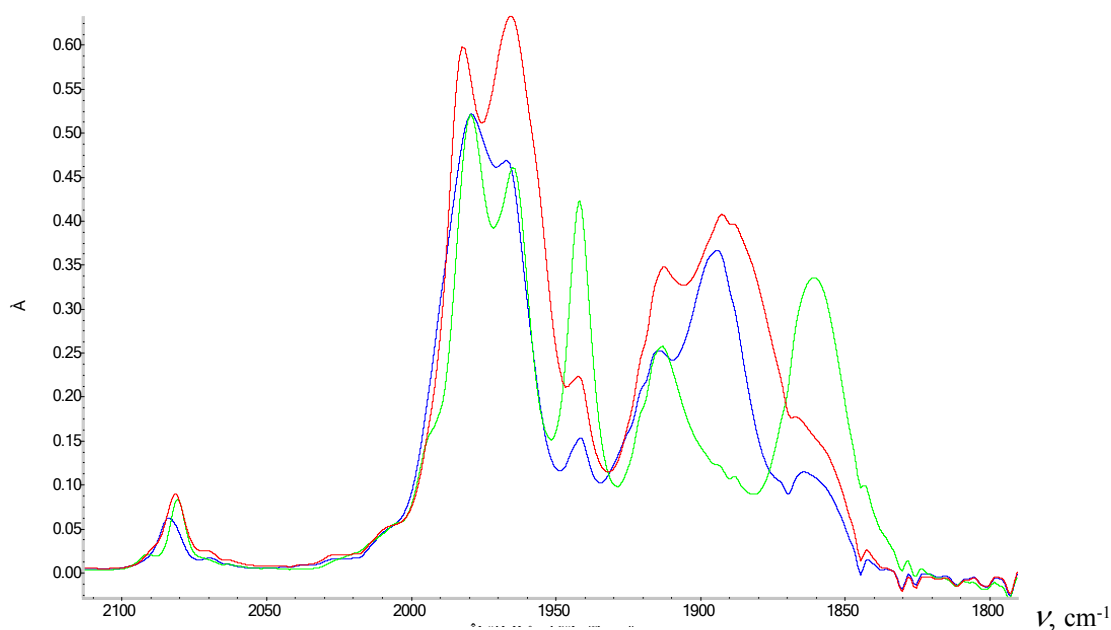

Figure S2. The IR spectra of rhenate anions in THF (superimposed for comparison): the iodo(acyl)rhenate  $\text{Na}[(\eta^6\text{-C}_6\text{H}_5\text{COPRe(CO)}_4\text{I)Cr(CO)}_3]$  (blue); the same iodo(acyl)rhenate in the presence of 18-crown-6 (red); the iodo(aryl)rhenate  $[\text{Et}_4\text{N}][(\eta^6\text{-C}_6\text{H}_5\text{Re(CO)}_4\text{I)Cr(CO)}_3]$  (green). Weak bands at 1942 and 1865  $\text{cm}^{-1}$  in the spectra of iodo(acyl)rhenate belong to a small impurity of iodo(aryl)rhenate.

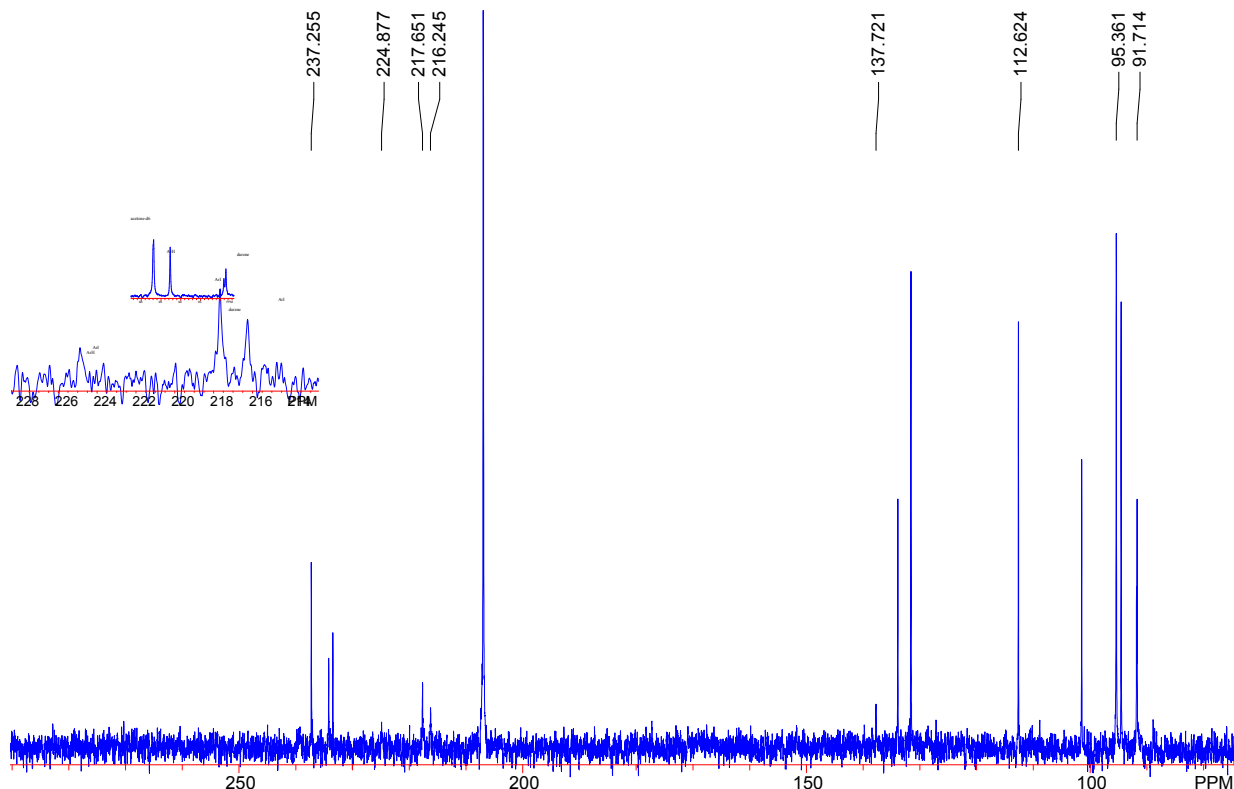

**Figure S3.** The  $^{13}\text{C}$  NMR spectrum for the completed reaction of  $[(\eta^6\text{-C}_6\text{H}_5\text{I})\text{Cr}(\text{CO})_3]$  with  $\text{K}[\text{Mn}(\text{CO})_5]$  at r.t. in the presence of 18-crown-6 (THF, 100.6 MHz).

The main component is  $\text{K}[(\eta^6\text{-C}_6\text{H}_5\text{Mn}(\text{CO})_4\text{I})\text{Cr}(\text{CO})_3]$  (its peaks are labeled), also present are the starting  $[(\eta^6\text{-C}_6\text{H}_5\text{I})\text{Cr}(\text{CO})_3]$  (labeled “ArI”) and its dehalogenation product,  $[(\eta^6\text{-C}_6\text{H}_6)\text{Cr}(\text{CO})_3]$ , (labeled “ArH”).

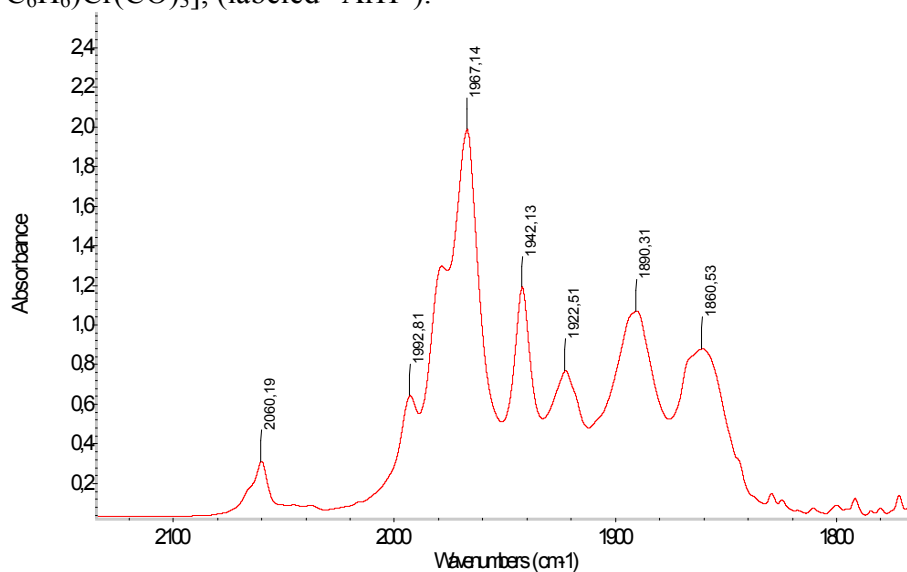

**Figure S4.** The IR spectrum for the completed reaction of  $[(\eta^6\text{-C}_6\text{H}_5\text{I})\text{Cr}(\text{CO})_3]$  with  $\text{K}[\text{Mn}(\text{CO})_5]$  at r.t. in the presence of 18-crown-6 in THF.

The spectrum is mainly that of  $\text{K}[(\eta^6\text{-C}_6\text{H}_5\text{Mn}(\text{CO})_4\text{I})\text{Cr}(\text{CO})_3]$ , except for the bands at  $1890\text{ cm}^{-1}$  and  $1967\text{ cm}^{-1}$  belonging to  $[(\eta^6\text{-C}_6\text{H}_6)\text{Cr}(\text{CO})_3]$  and a weak band at  $1993\text{ cm}^{-1}$  and shoulder at  $2066\text{ cm}^{-1}$  belonging to  $\text{K}[\text{Mn}(\text{CO})_4\text{I}_2]$ <sup>[1]</sup>.

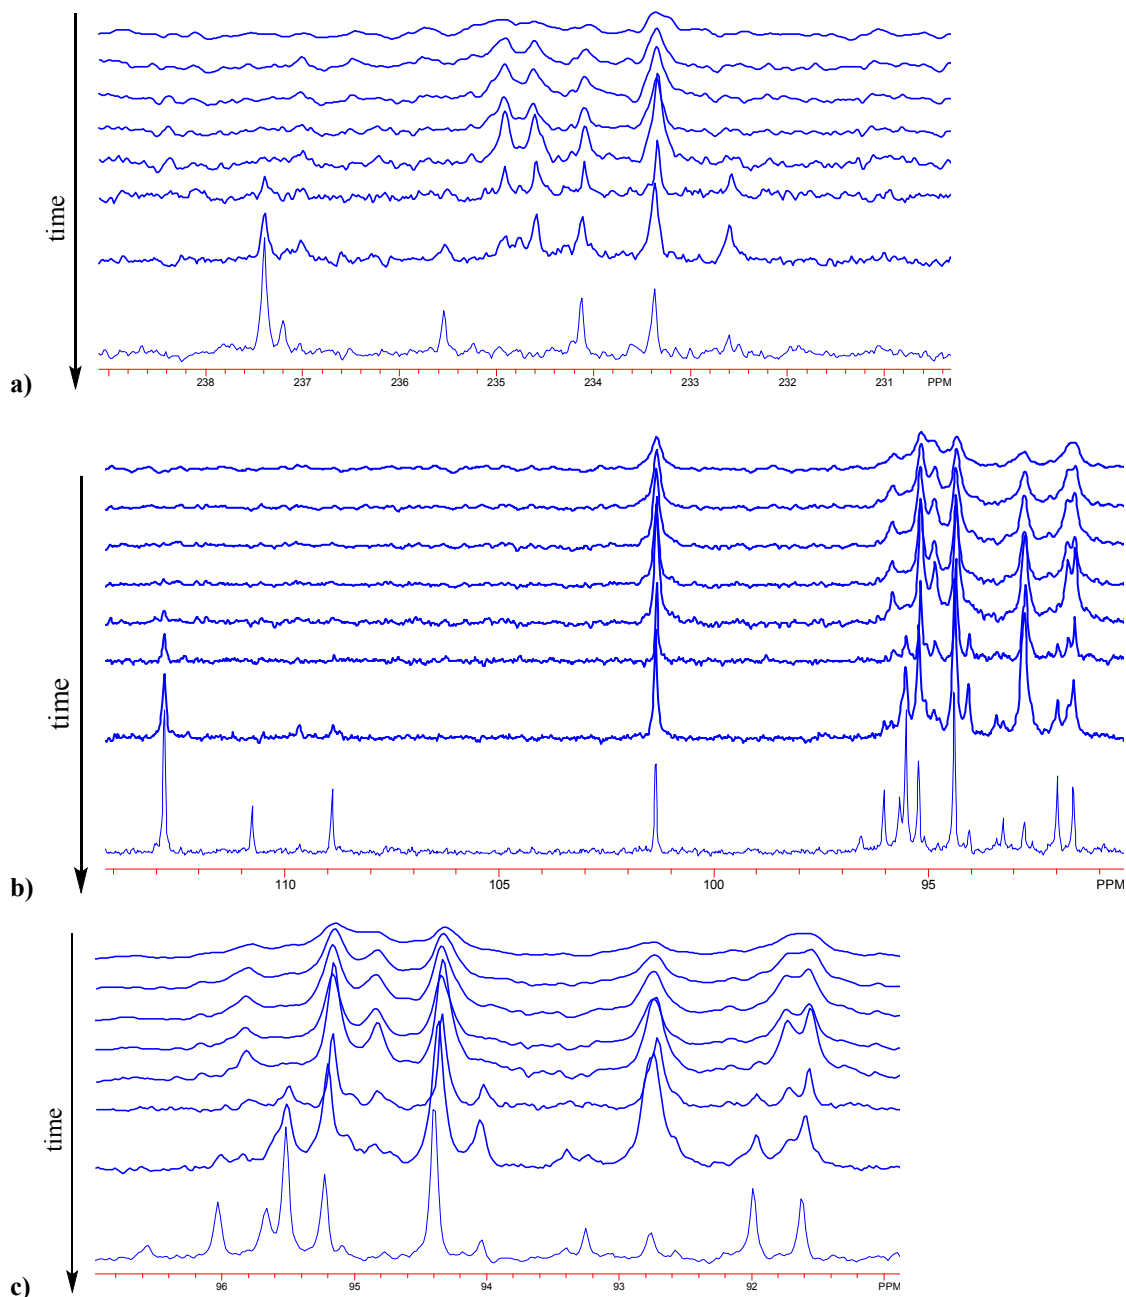

**Figure S5.** Time dependence of the  $^{13}\text{C}$  NMR spectra for the reaction of  $[(\eta^6\text{-C}_6\text{H}_5\text{I})\text{Cr}(\text{CO})_3]$  (0.19 mmol) with  $\text{K}[\text{Mn}(\text{CO})_5]$  (0.15 mmol) in THF (0.6 ml) at r.t.

The spectra (from top to bottom) were taken after 13 min (1); 16 min (2); 19 min (3); 22 min (4), 26 min (5); 33 min (6); 70 min (7) and 25 hr (8, at the bottom), the last one corresponds to the reaction completion.

**a)** Signals in the  $\text{Cr}(\text{CO})_3$  region. The signals of two intermediates appear at 234.6 and 235 ppm (signal at 234.1 belongs to  $[(\eta^6\text{-C}_6\text{H}_6)\text{Cr}(\text{CO})_3]$ ).

**b, c)** Signals of the arene ligands. The signals assigned to the  $\text{K}[(\eta^6\text{-C}_6\text{H}_5\text{C}(\text{O})\text{Mn}(\text{CO})_4\text{I})\text{Cr}(\text{CO})_3]$  intermediate can be seen at 95.8, 94.8 and 91.7 ppm, they decay already after 30 min (6 th spectrum). The second intermediate manifested by the signal at 92.7 ppm (actually two signals as seen in other experiments with better resolution) continues to build up till 70 min, but disappears towards the end of the reaction.

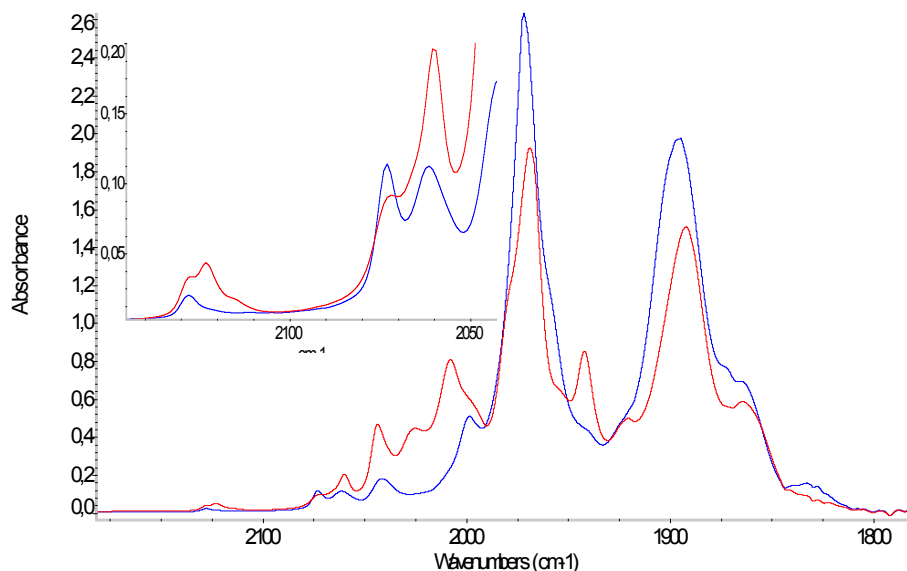

**Figure S6.** Time dependence of the IR spectra for the reaction of  $[(\eta^6\text{-C}_6\text{H}_5\text{I})\text{Cr}(\text{CO})_3]$  with  $\text{K}[\text{Mn}(\text{CO})_5]$  in THF at r.t.

The first spectrum (blue) was taken 20 min after the start of the reaction, and shows the band at  $2073\text{ cm}^{-1}$  attributed to iodo(acyl)manganate intermediate  $\text{K}[(\eta^6\text{-C}_6\text{H}_5\text{C}(\text{O})\text{Mn}(\text{CO})_4\text{I})\text{Cr}(\text{CO})_3]$ , which almost disappears in the second spectrum (red, taken after 4 hr), while the bands at  $2060$  and  $1942\text{ cm}^{-1}$  belonging to  $\text{K}[(\eta^6\text{-C}_6\text{H}_5\text{Mn}(\text{CO})_4\text{I})\text{Cr}(\text{CO})_3]$  appear, as well as the bands of other products –  $2123$  and  $2027\text{ cm}^{-1}$  of  $[(\eta^6\text{-C}_6\text{H}_5\text{Mn}(\text{CO})_5)\text{Cr}(\text{CO})_3]$ ,  $2044$  and  $2008$  of  $[\text{Mn}_2(\text{CO})_{10}]$ .

Strong bands at  $1890\text{--}1900$  and  $1965\text{--}1970\text{ cm}^{-1}$  visible in both spectra are mainly composed of the overlapping bands belonging to  $[(\eta^6\text{-C}_6\text{H}_5\text{I})\text{Cr}(\text{CO})_3]$  (main component in the first spectrum) and  $[(\eta^6\text{-C}_6\text{H}_6)\text{Cr}(\text{CO})_3]$ . In the first spectrum (blue) one can also see bands at  $1830$  and  $1865(\text{sh})$  belonging to  $\text{K}[\text{Mn}(\text{CO})_5]$ <sup>[2]</sup>.

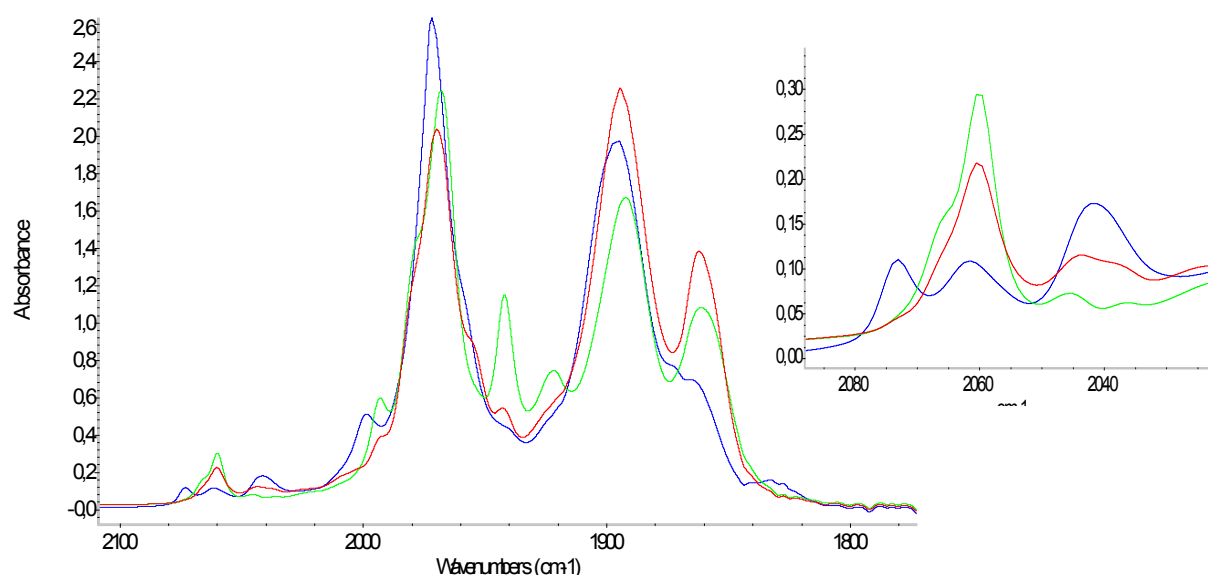

**Figure S7.** The effect of 18-crown-6 addition on the IR spectra of the reaction of  $[(\eta^6\text{-C}_6\text{H}_5\text{I})\text{Cr}(\text{CO})_3]$  with  $\text{K}[\text{Mn}(\text{CO})_5]$  in THF at r.t..

The first spectrum (blue) was taken 20 min after the start of the reaction (it's the same as in Fig. S6). On the addition of 18-crown-6 to this reaction solution (red spectrum) the band at  $2073\text{ cm}^{-1}$  attributed to the  $\text{K}[(\eta^6\text{-C}_6\text{H}_5\text{C}(\text{O})\text{Mn}(\text{CO})_4\text{I})\text{Cr}(\text{CO})_3]$  disappears, and at  $2060\text{ cm}^{-1}$  a new band appears, coinciding with the highest frequency band of iodo(aryl)manganate (Fig. S4). However, it cannot belong to iodo(aryl)manganate because at the moment its band at  $1942\text{ cm}^{-1}$  is very weak. The band at  $2060\text{ cm}^{-1}$  must then belong to the iodo(acyl)manganate intermediate. The large difference in the position of this band in the presence of 18-crown-6 ( $2060\text{ cm}^{-1}$ ) and in THF alone ( $2073\text{ cm}^{-1}$ ) can be attributed to the formation of contact ion pairs by  $\text{K}[(\eta^6\text{-C}_6\text{H}_5\text{C}(\text{O})\text{Mn}(\text{CO})_4\text{I})\text{Cr}(\text{CO})_3]$  in THF, which are transformed into crown-separated ion pairs upon the addition of 18-crown-6. The Na cation is better solvated by THF than K<sup>[2]</sup>, and the corresponding iodo(acyl)rhenate  $\text{Na}[(\eta^6\text{-C}_6\text{H}_5\text{C}(\text{O})\text{Re}(\text{CO})_4\text{I})\text{Cr}(\text{CO})_3]$  forms solvent-separated ion pairs, which is evidenced by a small shift of the corresponding band (from  $2084$  to  $2082\text{ cm}^{-1}$ ) upon the addition of 18-crown-6 (Figure S2).

The iodo(aryl)metallate anions do not have a localized hard donor center (acyl oxygen) for cation coordination and form solvent-separated ion pairs in THF, and the position of their highest frequency CO-band coincides with that for the corresponding acylmetallates in the presence of 18-crown-6 ( $2060\text{ cm}^{-1}$  for manganates and  $2081\text{-}2082\text{ cm}^{-1}$  for rhenates).

The third spectrum (green) was taken from the same reaction mixture 4 hr after the 18-crown-6 addition. The band of iodo(aryl)manganate at  $1942\text{ cm}^{-1}$  is now seen in the spectrum as well as weak band at  $1993\text{ cm}^{-1}$  and shoulder at  $2066\text{ cm}^{-1}$  belonging to  $[\text{K}\cdot 18\text{-crown-6}][\text{Mn}(\text{CO})_4\text{I}_2]$ <sup>[1]</sup>.

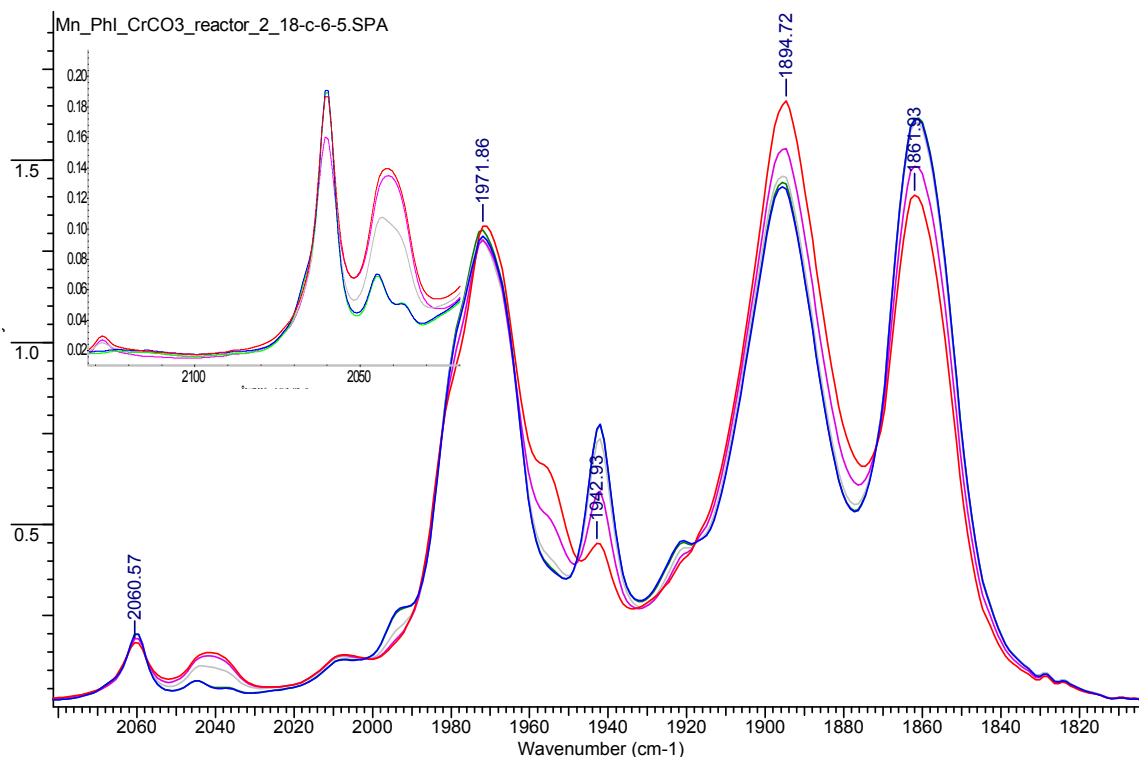

Figure S8. Time dependence of the IR spectra for the reaction of  $[(\eta^6\text{-C}_6\text{H}_5\text{I})\text{Cr}(\text{CO})_3]$  with  $\text{K}[\text{Mn}(\text{CO})_5]$  in the presence of 18-crown-6 in THF at r.t.

The probe of reaction mixture was taken after 15 min, diluted to  $\sim 2 \cdot 10^{-2} \text{ mol} \cdot \text{l}^{-1}$  and transferred to IR-cell (red line), the following spectra were recorded after 7 min (magenta), 23 min (grey), 67 min (green), 130 min (blue). The growth of the band at  $1942 \text{ cm}^{-1}$  corresponds to the buildup of iodo(aryl)manganate,  $\text{K}[(\eta^6\text{-C}_6\text{H}_5\text{Mn}(\text{CO})_4\text{I})\text{Cr}(\text{CO})_3]$  and the decay of weak bands at  $2040$  and  $2128 \text{ cm}^{-1}$  corresponds to the disappearance of the small amount of  $[\text{Mn}(\text{CO})_5\text{I}]$  formed as intermediate.

The band at  $2060 \text{ cm}^{-1}$  is already present in the first spectrum and grows only slightly, which means that it is a superposition of bands belonging to iodo(aryl)manganate product and the intermediate,  $\text{K}[(\eta^6\text{-C}_6\text{H}_5\text{C}(\text{O})\text{Mn}(\text{CO})_4\text{I})\text{Cr}(\text{CO})_3]$  (see also comments to Fig. S7).

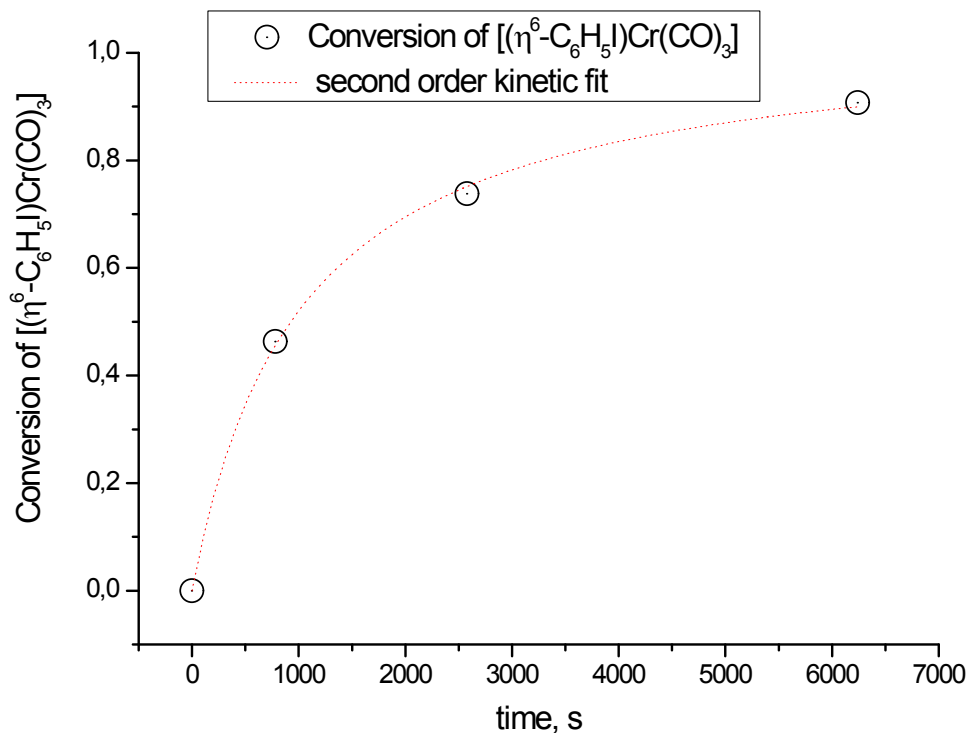

**Figure S9.** The rate plot for the reaction of  $[(\eta^6\text{-C}_6\text{H}_5\text{I})\text{Cr}(\text{CO})_3]$  with  $\text{K}[\text{Mn}(\text{CO})_5]$  in the presence of *t*-BuOH. The conversion was determined by  $^1\text{H}$  NMR spectroscopy using durene as internal standard.

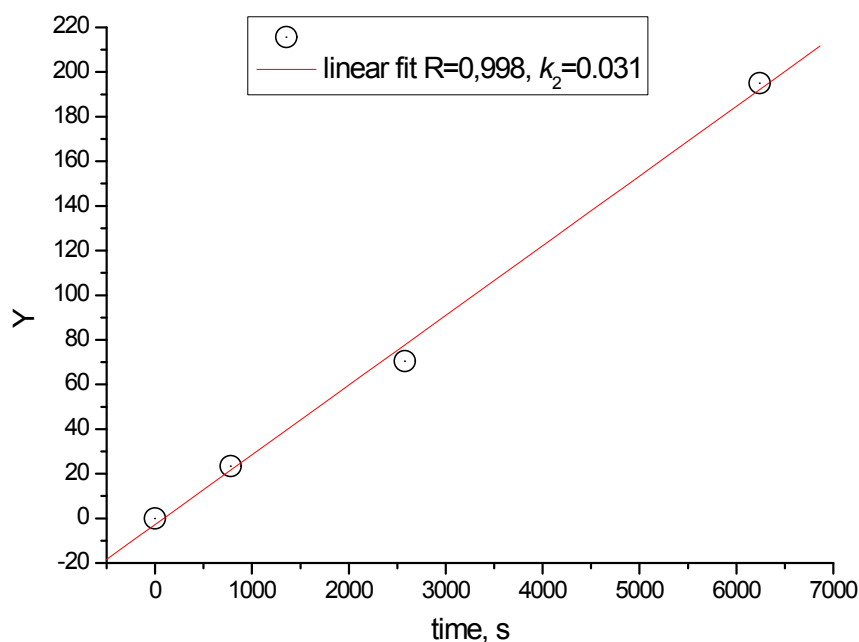

**Figure S10.** The linearization of kinetic curve (anamorphosis) for the reaction of  $[(\eta^6\text{-C}_6\text{H}_5\text{I})\text{Cr}(\text{CO})_3]$  with  $\text{K}[\text{Mn}(\text{CO})_5]$  in the presence of *t*-BuOH. The Y-coordinate corresponds to

the second order kinetic law: 
$$Y = \frac{1}{([\text{ArI}]_0 - [\text{KMn}(\text{CO})_5]_0)} \cdot \frac{[\text{KMn}(\text{CO})_5]_0 \cdot [\text{ArI}]}{[\text{KMn}(\text{CO})_5] \cdot [\text{ArI}]_0}$$



## References

- [1] W.-F. Liaw, C.-Y. Chuang, W.-Z. Lee, C.-K. Lee, G.-H. Lee, S.-M. Peng, *Inorg. Chem.* **1996**, 35, 2530.
- [2] M. Y. Darensbourg, D. J. Darensbourg, D. Burns, D. A. Drew, *J. Am. Chem. Soc.* **1976**, 98, 3127.
